# Supplementary material for: Modeling of gas generation from the river adjacent to the manufactured gas plant
Source: Royal Society of Chemistry journal article supplement (doi:10.1039/c4ra06627h), 2014-12-24
Supplement: c4ra06627h1.pdf [file c4ra06627h1.pdf]

1 **Supporting information:**

2

3

4 **Modeling of gas generation from the river adjacent to the manufactured**  
5 **gas plant**

6

7 **Tengyi Zhu<sup>1,2</sup>, Dafang Fu<sup>1\*</sup>, Chad T. Jafvert<sup>2</sup>, Rajendra Prasad Singh<sup>1,2</sup>**

8 *<sup>1</sup>School of Civil Engineering, Southeast University, Nanjing, 210096, China*

9 *<sup>2</sup>School of Civil Engineering, Purdue University, West Lafayette, IN 47907, USA*

10

11

12

13

14

15

16

17

18

19

20

21

22

23

24

25

26

27

28

29

30

31

32

Table. S1 Darcy velocities measured at the sediment-water interface

| No.  | Date                  | Flow direction        | Darcy V<br>(cm/day) | $K_s$ at<br>0-1.2 m<br>(cm s <sup>-1</sup> ) | n        | Temperature<br>(°C) | River Stage<br>(m) | Hydraulic Head (m) |        |         |          | <i>i</i> (m/m) |         |      |
|------|-----------------------|-----------------------|---------------------|----------------------------------------------|----------|---------------------|--------------------|--------------------|--------|---------|----------|----------------|---------|------|
|      |                       |                       |                     |                                              |          |                     |                    | 1.2 m              | 2.4 m  | 0-1.2 m | 1.2-2.4m | 0-1.2          | 1.2-2.4 |      |
| RC3  | 2011/3/28             | No flow               | <0.25               |                                              | 3        | 8.55                | 175.93             | 175.79             | 175.92 | -0.14   | 0.13     | -0.12          | 0.11    |      |
|      | 2011/4/18             | Recharge              | 1.4                 |                                              | 3        | 10.23               | 175.97             | 175.95             | 175.93 | -0.02   | -0.02    | -0.02          | -0.02   |      |
|      | 2011/5/6              | Recharge              | 1.9                 | No value                                     | 2        | 10.95               | 175.94             | 175.91             | 175.88 | -0.03   | -0.03    | -0.03          | -0.03   |      |
|      | 2012/3/1              | Recharge              | <0.25               |                                              | 4        | 7.01                | 176.07             | 175.98             | 175.96 | -0.09   | -0.02    | -0.08          | -0.02   |      |
|      | 2012/5/11             | Discharge             | 1.38                | 7.99E-05                                     | 7        | 13.52               | 175.66             | 175.9              | 175.97 | 0.24    | 0.07     | 0.20           | 0.06    |      |
| RC5  | 2011/4/1              | No flow               |                     |                                              | 3        | 7.76                | 175.89             | 175.95             | 175.99 | 0.06    | 0.04     | 0.05           | 0.03    |      |
|      | 2011/4/21             | No flow               | <0.25               | No value                                     | 3        | 9.24                | 175.94             | 175.98             | 175.97 | 0.04    | -0.01    | 0.03           | -0.01   |      |
|      | 2011/4/21             | Recharge              | 2.5                 | -6.94E-04                                    | 1        | 9.25                | 176.02             | 175.97             | 175.96 | -0.05   | -0.01    | -0.04          | -0.01   |      |
|      | 2011/5/18             | Discharge             | 1.6                 |                                              | 2        | 11.08               | 176.01             | 176.06             | 176.08 | 0.05    | 0.02     | 0.04           | 0.02    |      |
|      | 2011/5/18             | No flow               |                     |                                              | 4        | 11.14               | 176.02             | 176                | 176.04 | -0.02   | 0.04     | -0.02          | 0.03    |      |
| RC6  | 2011/12/19            | Discharge             | <0.25               | No value                                     | 5        | 8.36                | 175.82             | 175.84             | 175.95 | 0.02    | 0.11     | 0.02           | 0.09    |      |
|      | 2011/3/30             | Discharge             | <0.25               |                                              | 2        | 8.88                | 175.94             | 176                | 176.03 | 0.06    | 0.03     | 0.05           | 0.03    |      |
|      | 2011/4/20             | Discharge             | <0.25               |                                              | 4        | 11.29               | 176.08             | 176.14             | 176.19 | 0.06    | 0.05     | 0.05           | 0.04    |      |
|      | 2011/5/11             | Discharge             | 1.8                 | 3.57E-04                                     | 4        | 11.41               | 175.92             | 175.99             | 176.24 | 0.07    | 0.25     | 0.06           | 0.21    |      |
|      | 2012/4/5              | Recharge              | <0.25               | No value                                     | 6        | 10.54               | 176.04             | 176.01             | 175.96 | -0.03   | -0.05    | -0.03          | -0.04   |      |
| RC7  | 2011/4/5              | No flow               | <0.25               |                                              | 4        | 7.24                | 175.84             | 176.02             | 176.14 | 0.18    | 0.12     | 0.15           | 0.10    |      |
|      | 2011/4/11             | Discharge             | 1.2                 | 7.94E-05                                     | 3        | 8.06                | 175.81             | 176.02             | 176.14 | 0.21    | 0.12     | 0.18           | 0.10    |      |
|      | 2011/5/20             | No flow               |                     |                                              | 4        | 11.42               | 175.89             | 176.14             | 176.25 | 0.25    | 0.11     | 0.21           | 0.09    |      |
|      | 2011/12/28            | No flow               | <0.25               | No value                                     | 6        | 6.53                | 175.78             | 175.98             | 176.22 | 0.2     | 0.24     | 0.17           | 0.20    |      |
|      | 2012/3/8              | Discharge             | 0.55                | 5.46E-05                                     | 5        | 7.02                | 176.02             | 176.16             | 176.35 | 0.14    | 0.19     | 0.12           | 0.16    |      |
| RC8  | 2012/4/12             | Discharge             | <0.25               |                                              | 6        | 10.71               | 175.99             | 176.21             | 176.36 | 0.22    | 0.15     | 0.18           | 0.13    |      |
|      | 2012/5/15             | No flow               | <0.25               | No value                                     | 6        | 12.71               | 175.96             | 176.24             | 176.38 | 0.28    | 0.14     | 0.23           | 0.12    |      |
|      | 2011/4/6              | Discharge             | 1.3                 | 9.03E-04                                     | 2        | 7.8                 | 175.92             | 175.94             | 176.02 | 0.02    | 0.08     | 0.02           | 0.07    |      |
|      | 2011/4/6              | Discharge             | 1.1                 | 7.64E-04                                     | 2        | 7.82                | 175.9              | 175.92             | 176    | 0.02    | 0.08     | 0.02           | 0.07    |      |
|      | 2011/4/29             | Discharge             | 0.95                | 8.80E-05                                     | 6        | 9.19                | 175.92             | 176.07             | 176.26 | 0.15    | 0.19     | 0.13           | 0.16    |      |
| RC11 | 2011/5/23             | No flow               | <0.25               |                                              | 4        | 11.7                | 175.85             | 176.01             | 176.22 | 0.16    | 0.21     | 0.13           | 0.18    |      |
|      | 2012/1/7              | No flow               | <0.25               | No value                                     | 4        | 6.99                | 175.76             | 175.83             | 176.09 | 0.07    | 0.26     | 0.06           | 0.22    |      |
|      | 2012/3/15             | Recharge              | <0.25               |                                              | 6        | 7.82                | 175.95             | 176.02             | 176.16 | 0.07    | 0.14     | 0.06           | 0.12    |      |
|      | 2012/5/8              | Discharge             | 2.31                | 1.60E-03                                     | 6        | 12.59               | 176.05             | 176.07             | 176.27 | 0.02    | 0.2      | 0.02           | 0.17    |      |
|      | 2012/5/18             | No flow               | <0.25               | No value                                     | 5        | 13.34               | 175.94             | 176.09             | 176.29 | 0.15    | 0.2      | 0.13           | 0.17    |      |
| RC12 | 2011/4/8              | Discharge             | 0.75                | 4.96E-05                                     | 6        | 8.13                | 175.91             | 176.12             | 176.23 | 0.21    | 0.11     | 0.18           | 0.09    |      |
|      | 2011/5/4              | Discharge             | 2.1                 | 2.92E-03                                     | 6        | 10.53               | 175.91             | 175.92             | 176.18 | 0.01    | 0.26     | 0.01           | 0.22    |      |
|      | 2011/6/1              | No flow               |                     | No value                                     | 6        | 13.26               | 176                | 176.28             | 176.33 | 0.28    | 0.05     | 0.23           | 0.04    |      |
|      | 2012/2/9              | No flow               | <0.25               | No value                                     | 4        | 4.2                 | 176.17             | 176.07             | 176.24 | -0.1    | 0.17     | -0.08          | 0.14    |      |
|      | 2012/3/27             | Recharge              | <0.25               | No value                                     | 5        | 11.64               | 176.03             | 176.02             | 176.13 | -0.01   | 0.11     | -0.01          | 0.09    |      |
| RC12 | 2012/4/26             | Recharge              | 0.29                | 1.26E-05                                     | 6        | 11.67               | 176.06             | 176.38             | 176.17 | 0.32    | -0.21    | 0.27           | -0.18   |      |
|      | 2012/5/22             | No flow               | <0.25               | No value                                     | 5        | 14.6                | 175.99             | 176.03             | 176.16 | 0.04    | 0.13     | 0.03           | 0.11    |      |
|      | 2011/4/13             | Discharge             | 0.77                | 1.53E-04                                     | 4        | 9.83                | 175.79             | 175.86             | 175.98 | 0.07    | 0.12     | 0.06           | 0.10    |      |
|      | 2011/5/9              | Recharge              | 1.7                 | -2.36E-03                                    | 6        | 11.72               | 176.04             | 176.03             | 176.02 | -0.01   | -0.01    | -0.01          | -0.01   |      |
|      | 2011/6/8              | No flow               | <0.25               | No value                                     | 5        | 15.89               | 176.06             | 176.14             | 176.11 | 0.08    | -0.03    | 0.07           | -0.02   |      |
|      | 2012/1/16             | Discharge             | 0.29                | 9.59E-06                                     | 4        | 5.08                | 175.79             | 176.21             | 176.23 | 0.42    | 0.02     | 0.35           | 0.02    |      |
|      | RC12                  | 13:58-14:28 discharge |                     | 2.13                                         | 1.85E-04 | 1                   | 4.92               | 175.82             | 175.98 | 176.14  | 0.16     | 0.16           | 0.13    | 0.13 |
|      |                       | 14:30-15:00 discharge |                     | 1.5                                          | 1.23E-04 | 1                   | 4.91               | 175.83             | 176    | 176.14  | 0.17     | 0.14           | 0.14    | 0.12 |
|      |                       | 15:19-15:49 discharge |                     | 0.73                                         | 6.34E-05 | 1                   | 4.9                | 175.84             | 176    | 176.14  | 0.16     | 0.14           | 0.13    | 0.12 |
|      |                       | 15:51-16:21 discharge |                     | 0.48                                         | 4.44E-05 | 1                   | 4.93               | 175.85             | 176    | 176.13  | 0.15     | 0.13           | 0.13    | 0.11 |
| RC12 | 16:22-16:52 discharge |                       | 0.23                | 2.46E-05                                     | 1        | 4.92                | 175.87             | 176                | 176.13 | 0.13    | 0.13     | 0.11           | 0.11    |      |
|      | 2012/3/29             | Recharge              | <0.25               | No value                                     | 6        | 11.51               | 176.06             | 176.03             | 176.01 | -0.03   | -0.02    | -0.03          | -0.02   |      |
|      | 2012/4/30             | Discharge             | 1.48                | 1.47E-04                                     | 6        | 12.03               | 175.98             | 176.12             | 176.4  | 0.14    | 0.28     | 0.12           | 0.23    |      |
|      | 2012/5/25             | Recharge              | 0.4                 | -1.85E-04                                    | 6        | 15.26               | 176.01             | 175.98             | 175.65 | -0.03   | -0.33    | -0.03          | -0.27   |      |

n = Number of measurements
